# Supplementary material for: Predictable Irreversible Switching Between Acute and Chronic Inflammation
Source: PubMed Central journal article supplement (PMC6090016; doi:10.3389/fimmu.2018.01596), 2018-08-07

## *Supplementary Material*

# **Predictable Irreversible Switching between Acute and Chronic Inflammation**

**Abulikemu Abudukelimu, Matteo Barberis, Frank Redegeld, Nilgun Sahin, Hans V. Westerhoff\***

\* **Correspondence:** Prof. dr. Hans V. Westerhoff: [Hans.Westerhoff@manchester.ac.uk](mailto:Hans.Westerhoff@manchester.ac.uk) or H.V. [Westerhoff@UvA.NL](mailto:Westerhoff@UvA.NL)

### **Supplementary Data:**

- 1. Table 1: Key molecules in the network**
- 2. Correspondence between names**
- 3. Initial conditions for standard model**
- 4. The models**

## 1. Supplementary Table 1- key molecules in the network

| Abbreviation                   | Description                 | References                                                                           |
|--------------------------------|-----------------------------|--------------------------------------------------------------------------------------|
| <b>CRA</b>                     | Cross-reacting antigen      | Ng LG <i>et al</i> (2); Krumbholz <i>et al</i> (3); Zougari Y <i>et al</i> (4)       |
| <b>FLC</b>                     | Free light chain            | Redegeld <i>et al</i> (5); Rijnierse <i>et al</i> (6); Maurer <i>et al</i> (7)       |
| <b>MMP-7</b>                   | Metalloproteinase-7         | Ii <i>et al</i> (8); Slattery <i>et al</i> (9); Zeng <i>et al</i> (10)               |
| <b>MMP-8</b>                   | Metalloproteinase-8         | Vayrynen <i>et al</i> (11); Thirkettle <i>et al</i> (12); Quintero <i>et al</i> (13) |
| <b>TNF-<math>\alpha</math></b> | Tumor necrosis factor-alpha | Bradley <i>et al</i> (14); Chastre <i>et al</i> (15); Jo <i>et al</i> (16)           |

1. Choi, S., and SpringerLink (Online service). Systems Biology for Signaling Networks. In *Systems Biology*,. XVI, 908p. 326 illus., 910 illus. in color.
2. Ng, L. G., A. P. Sutherland, R. Newton, F. Qian, T. G. Cachero, M. L. Scott, J. S. Thompson, J. Wheway, T. Chtanova, J. Groom, I. J. Sutton, C. Xin, S. G. Tangye, S. L. Kalled, F. Mackay, and C. R. Mackay. 2004. B cell-activating factor belonging to the TNF family (BAFF)-R is the principal BAFF receptor facilitating BAFF costimulation of circulating T and B cells. *J Immunol* **173**: 807-817.
3. Krumbholz, M., and E. Meinl. 2014. B cells in MS and NMO: pathogenesis and therapy. *Semin Immunopathol* **36**: 339-350.
4. Zougari, Y., H. Ait-Oufella, P. Bonnin, T. Simon, A. P. Sage, C. Guerin, J. Vilar, G. Caligiuri, D. Tsiantoulas, L. Laurans, E. Dumeau, S. Kotti, P. Bruneval, I. F. Charo, C. J. Binder, N. Danchin, A. Tedgui, T. F. Tedder, J. S. Silvestre, and Z. Mallat. 2013. B lymphocytes trigger monocyte mobilization and impair heart function after acute myocardial infarction. *Nat Med* **19**: 1273-1280.
5. Redegeld, F. A., M. W. van der Heijden, M. Kool, B. M. Heijdra, J. Garssen, A. D. Kraneveld, H. Van Loveren, P. Roholl, T. Saito, J. S. Verbeek, J. Claassens, A. S. Koster, and

- F. P. Nijkamp. 2002. Immunoglobulin-free light chains elicit immediate hypersensitivity-like responses. *Nat Med* **8**: 694-701.
6. Rijnierse, A., F. A. Redegeld, B. R. Blokhuis, M. W. Van der Heijden, A. A. Te Velde, I. Pronk, D. W. Hommes, F. P. Nijkamp, A. S. Koster, and A. D. Kraneveld. 2010. Ig-free light chains play a crucial role in murine mast cell-dependent colitis and are associated with human inflammatory bowel diseases. *J Immunol* **185**: 653-659.
  7. Maurer, M. J., I. N. Micallef, J. R. Cerhan, J. A. Katzmann, B. K. Link, J. P. Colgan, T. M. Habermann, D. J. Inwards, S. N. Markovic, S. M. Ansell, L. F. Porrata, P. B. Johnston, G. S. Nowakowski, C. A. Thompson, M. Gupta, S. I. Syrbu, P. J. Kurtin, W. R. Macon, D. A. Nikcevich, and T. E. Witzig. 2011. Elevated serum free light chains are associated with event-free and overall survival in two independent cohorts of patients with diffuse large B-cell lymphoma. *J Clin Oncol* **29**: 1620-1626.
  8. Ii, M., H. Yamamoto, Y. Adachi, Y. Maruyama, and Y. Shinomura. 2006. Role of matrix metalloproteinase-7 (matrilysin) in human cancer invasion, apoptosis, growth, and angiogenesis. *Exp Biol Med (Maywood)* **231**: 20-27.
  9. Slattery, M. L., E. John, G. Torres-Mejia, M. Stern, A. Lundgreen, L. Hines, A. Giuliano, K. Baumgartner, J. Herrick, and R. K. Wolff. 2013. Matrix metalloproteinase genes are associated with breast cancer risk and survival: the Breast Cancer Health Disparities Study. *PLoS One* **8**: e63165.
  10. Zeng, Z. S., W. P. Shu, A. M. Cohen, and J. G. Guillem. 2002. Matrix metalloproteinase-7 expression in colorectal cancer liver metastases: evidence for involvement of MMP-7 activation in human cancer metastases. *Clin Cancer Res* **8**: 144-148.
  11. Vayrynen, J. P., J. Vornanen, T. Tervahartiala, T. Sorsa, R. Bloigu, T. Salo, A. Tuomisto, and M. J. Makinen. 2012. Serum MMP-8 levels increase in colorectal cancer and correlate with disease course and inflammatory properties of primary tumors. *Int J Cancer* **131**: E463-474.
  12. Thirkettle, S., J. Decock, H. Arnold, C. J. Pennington, D. M. Jaworski, and D. R. Edwards. 2013. Matrix metalloproteinase 8 (collagenase 2) induces the expression of interleukins 6 and 8 in breast cancer cells. *J Biol Chem* **288**: 16282-16294.
  13. Quintero, P. A., M. D. Knolle, L. F. Cala, Y. Zhuang, and C. A. Owen. 2010. Matrix metalloproteinase-8 inactivates macrophage inflammatory protein-1 alpha to reduce acute lung inflammation and injury in mice. *J Immunol* **184**: 1575-1588.
  14. Bradley, J. R. 2008. TNF-mediated inflammatory disease. *J Pathol* **214**: 149-160.
  15. Chastre, A., M. Belanger, E. Beauchesne, B. N. Nguyen, P. Desjardins, and R. F. Butterworth. 2012. Inflammatory cascades driven by tumor necrosis factor-alpha play a major role in the progression of acute liver failure and its neurological complications. *PLoS One* **7**: e49670.

16. Jo, M., T. H. Kim, D. W. Seol, J. E. Esplen, K. Dorko, T. R. Billiar, and S. C. Strom. 2000. Apoptosis induced in normal human hepatocytes by tumor necrosis factor-related apoptosis-inducing ligand. *Nat Med* **6**: 564-567.

## 2. Supplementary Table of name correspondences

The models have been developed for two instantiations of substances. Correspondence between the names are:

BAFF=CRA

FLC = IgE

FLC\_Drug = IgE\_drug

MastCells\_FLC\_CRA = MastCells\_IgE\_CRA

## 3. Initial conditions for standard model

The model that led to the dashed line in Fig. 4A had the initial conditions for the variables as given in the following Table. Initial conditions for the other Figures were the same except as indicated in legend or text. An example of a different initial conditions are the calculations that led to the full blue line in Fig. 4A, where the steady state computed for the standard state at 30 fM/min CRA influx was used as initial condition. All precise initial conditions can be found in the Copasi models.

| Name              | Compartment | Type       | Initial Concentration (fmol/l) | Concentration (fmol/l) |
|-------------------|-------------|------------|--------------------------------|------------------------|
| CRA               | compartment | reactions  | 0.00999412                     | nan                    |
| MMP8              | compartment | reactions  | 999509                         | nan                    |
| washout           | compartment | reactions  | 1                              | nan                    |
| IgE               | compartment | reactions  | 0.000999412                    | nan                    |
| MMP7              | compartment | reactions  | 99.951                         | nan                    |
| Protease          | compartment | reactions  | 1                              | nan                    |
| Bcells            | compartment | fixed      | 1                              | 1                      |
| drug              | compartment | fixed      | 0                              | 0                      |
| IgE_drug          | compartment | fixed      | 0                              | 0                      |
| DyingFibr         | compartment | reactions  | 0                              | nan                    |
| HealthyFibr       | compartment | reactions  | 999.509                        | nan                    |
| TNFalpha          | compartment | reactions  | 0.000475162                    | nan                    |
| HealthyBacteria   | compartment | fixed      | 0                              | 0                      |
| free_space        | compartment | assignment | 0.491                          | nan                    |
| DyingBacteria     | compartment | fixed      | 0                              | 0                      |
| MastCells_IgE     | compartment | reactions  | 9.98404e-05                    | nan                    |
| MastCells_IgE_CRA | compartment | reactions  | 9.97816e-07                    | nan                    |
| MastCells         | compartment | reactions  | 0.0998992                      | nan                    |
| Total space       | compartment | fixed      | 1000                           | 1000                   |

#### 4. The models

For all Figures the Copasi models have been uploaded as separate supplementary material in a zipfile. Some of the models may use different names (instantiations) for the same mathematical instantiations (see 'name correspondences above').

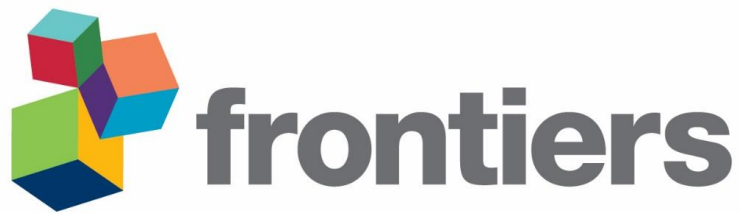

Supplement: data_sheet_1.pdf [file data_sheet_1.pdf]
